# Supplementary material for: Identification of a super-functional Tfh-like subpopulation in murine lupus by pattern perception
Source: eLife. 2020 May 22;9:e53226. doi: 10.7554/eLife.53226 (PMC7274784; doi:10.7554/eLife.53226)
Supplement: Figure 1—source data 1. [file elife-53226-fig1-data1.xlsx]

## Sheet: 1D-stack
	CD44+IFNg+TNFa+	CD44+IFNg+TNFa-	CD44+IFNg-TNFa+	CD44+IFNg-TNFa-	CD44-IFNg+TNFa+	CD44-IFNg+TNFa-	CD44-IFNg-TNFa+	CD44-IFNg-TNFa-
Mouse 1	20.9	19.6	9.72	38.6	0.38	1.12	3.44	6.25
Mouse 2	12.3	7.27	12.5	19.9	0.61	0.26	35.4	11.8
Mouse 3	18.1	10.7	12.4	25	0.68	0.37	26.2	6.58
Mouse 4	15.2	8.43	10.4	20.2	0.85	0.32	37.8	6.83
Mean	16.6	11.5	11.3	25.9	0.63	0.52	25.7	7.87
