# Supplementary material for: Identification of a super-functional Tfh-like subpopulation in murine lupus by pattern perception
Source: eLife. 2020 May 22;9:e53226. doi: 10.7554/eLife.53226 (PMC7274784; doi:10.7554/eLife.53226)
Supplement: Figure 2—figure supplement 1—source data 1. — Data represent one experiment with PMA/ionomycin stimulated splenic T cells: n = 2 mice per group. [file elife-53226-fig2-figsupp1-data1.xlsx]

## Sheet: figure supplement 1B cytokine
	PD1neg		PD1low		PD1high
	Mean Y	Mean O	Mean Y	Mean O	Mean Y	Mean O
IFNg+IL2+IL10+TNF+	0.419686	1.57197	2.25757	3.07886	1.27886	1.20314
IFNg+IL2+IL10+TNF-	0.00388714	0.00964286	0.0590714	0.100971	0.117886	0.146157
IFNg+IL2+IL10-TNF+	16.2286	20.6071	25.0286	20.6857	10.6929	7.08429
IFNg+IL2-IL10+TNF+	0.422814	1.0104	2.362	5.07857	3.93571	5.47857
IFNg-IL2+IL10+TNF+	0.215829	0.475643	0.3731	0.4555	0.253214	0.264929
IFNg+IL2+IL10-TNF-	0.06972	0.125714	0.463571	0.636571	1.02571	0.846429
IFNg+IL2-IL10+TNF-	0.0967314	0.140686	1.51643	3.84857	5.71571	8.48286
IFNg+IL2-IL10-TNF+	17.6914	10.2871	13.8843	12.5543	16.6	10.5229
IFNg-IL2+IL10+TNF-	0.00213714	0.01062	0.0351329	0.0636286	0.0774057	0.0815429
IFNg-IL2+IL10-TNF+	19.7143	23.3	10.56	6.19857	3.07143	2.87857
IFNg-IL2-IL10+TNF+	0.596514	1.15286	1.32857	2.05529	2.04271	2.29371
IFNg-IL2+IL10-TNF-	0.167857	0.374	0.441857	0.571571	0.72	0.840857
IFNg+IL2-IL10-TNF-	2.14714	2.56143	6.21714	7.79571	11.5086	10.8814
IFNg-IL2-IL10+TNF-	0.2595	0.763857	2.70714	5.03286	6.32714	8.89571
IFNg-IL2-IL10-TNF+	30.1143	19.8286	12.9271	8.97571	12.8529	9.85143
IFNg-IL2-IL10-TNF-	11.8971	17.7686	19.0857	23.6071	23.7757	30.2214
