# Supplementary material for: Identification of a super-functional Tfh-like subpopulation in murine lupus by pattern perception
Source: eLife. 2020 May 22;9:e53226. doi: 10.7554/eLife.53226 (PMC7274784; doi:10.7554/eLife.53226)
Supplement: Figure 2—figure supplement 2—source data 1. — Data represent two independent experiments with n = 4 mice per group. [file elife-53226-fig2-figsupp2-data1.xlsx]

## Sheet: figure supplement 2B MFI
IL-2	Score 1				Score 5
PD-1 (neg)	683	621	612	479	646	617	680	629
PD-1 (int)	699	659	663	506	549	608	652	631
PD-1 (hi)	525	532	564	457	483	475	530	548
TNF-a
PD-1 (neg)	6176	6318	7150	4134	5991	5240	5470	5916
PD-1 (int)	5149	6052	6512	3832	1972	2491	2861	3253
PD-1 (hi)	1493	1550	1762	1351	1285	1504	1574	1363
IFN-g
PD-1 (neg)	2099	1940	2261	1533	3268	2171	2234	2818
PD-1 (int)	2922	3113	3260	2109	2261	2240	2527	2645
PD-1 (hi)	1690	1702	2140	1666	1544	1221	1432	1484
IL-10
PD-1 (neg)	1662	1658	1748	1494	1646	1654	1639	1690
PD-1 (int)	2112	1970	2032	1662	2067	2102	2143	2200
PD-1 (hi)	2575	2383	2507	1846	2343	2320	2447	2569
