# Supplementary material for: Identification of a super-functional Tfh-like subpopulation in murine lupus by pattern perception
Source: eLife. 2020 May 22;9:e53226. doi: 10.7554/eLife.53226 (PMC7274784; doi:10.7554/eLife.53226)
Supplement: Figure 2—figure supplement 2—source data 2. — Data represent two independent experiments with n = 7 mice per group. [file elife-53226-fig2-figsupp2-data2.xlsx]

## Sheet: figure supplement 2E_pie charts
		PD1-
	Sample	IFNg+IL2+IL10+TNF+	IFNg+IL2+IL10+TNF-	IFNg+IL2+IL10-TNF+	IFNg+IL2-IL10+TNF+	IFNg-IL2+IL10+TNF+	IFNg+IL2+IL10-TNF-	IFNg+IL2-IL10+TNF-	IFNg+IL2-IL10-TNF+	IFNg-IL2+IL10+TNF-	IFNg-IL2+IL10-TNF+	IFNg-IL2-IL10+TNF+	IFNg-IL2+IL10-TNF-	IFNg+IL2-IL10-TNF-	IFNg-IL2-IL10+TNF-	IFNg-IL2-IL10-TNF+	IFNg-IL2-IL10-TNF-
TL160721	Y1	0.0223	0.00558	15.9	0.112	0.151	0.106	0.0167	20	0	23.5	0.279	0.307	2.14	0.262	19.2	18
	Y2	0.0491	0	14.7	0.108	0.0983	0.0639	0.0197	23.9	0	23.4	0.26	0.192	1.77	0.128	23	12.4
	Y3	0.0764	0.00347	19.9	0.177	0.0973	0.0764	0.0486	26.3	0	19.7	0.299	0.181	2.15	0.146	18.3	12.6
	Y4	0	0	7.2	0.0427	0.0142	0.121	0.00712	27.2	0	11.7	0.0676	0.214	3.53	0.0605	30.1	19.8
SG160907	Y1	0.83	0.00337	12.6	0.49	0.61	0.00674	0.025	2.24	0.00225	27.5	1.38	0.15	0.11	0.4	45.2	8.48
	Y2	0.89	0.00521	20.3	0.99	0.23	0.062	0.25	12.2	0.00313	15.8	0.87	0.065	2.32	0.34	40.7	5.01
	Y3	1.07	0.00958	23	1.04	0.31	0.052	0.31	12	0.00958	16.4	1.02	0.066	3.01	0.48	34.3	6.99
TL160721	O1	0.0974	0.0195	9.65	0.195	0.039	0.214	0.039	9.76	0	27.7	0.273	0.526	4.01	0.37	18.5	28.6
	O2	0.0492	0	12.2	0.0795	0.0833	0.163	0.0227	16.6	0.00379	25.1	0.216	0.413	3.13	0.14	23.9	17.9
	O3	0.0456	0	12.5	0.0913	0.145	0.205	0.0609	10.6	0.00761	30.1	0.342	0.753	2.97	0.266	21.5	20.4
	O4	0.0316	0	13.2	0.217	0.0722	0.131	0.0722	14.5	0.00451	22.8	0.339	0.46	3.32	0.311	22.9	21.5
SG160907	O1	4.26	0.019	26.2	2.48	1.18	0.036	0.12	5.14	0.022	22.4	2.94	0.18	0.29	1.2	23.1	10.4
	O2	3.4	0.018	19.7	2.41	1.39	0.053	0.32	4.01	0.029	21.4	3.31	0.23	0.83	2.71	19.6	20.6
	O3	3.12	0.011	50.8	1.6	0.42	0.078	0.35	11.4	0.00743	13.6	0.65	0.056	3.38	0.35	9.3	4.98
	Mean Y	0.419686	0.00388714	16.2286	0.422814	0.215829	0.06972	0.0967314	17.6914	0.00213714	19.7143	0.596514	0.167857	2.14714	0.2595	30.1143	11.8971
	Mean O	1.57197	0.00964286	20.6071	1.0104	0.475643	0.125714	0.140686	10.2871	0.01062	23.3	1.15286	0.374	2.56143	0.763857	19.8286	17.7686
		PD1low
TL160721	Y1	0.922	0.0522	21.9	1.22	0.274	0.403	0.974	12	0.0468	16.2	0.657	0.709	4.11	2.01	13.6	25
	Y2	0.763	0.0259	24.4	1.08	0.169	0.38	0.801	14.1	0.019	15.5	0.519	0.477	4.2	1.35	15.3	20.9
	Y3	1	0.0305	27.1	1.2	0.261	0.4	0.683	14.2	0.0329	14.4	0.822	0.55	3.48	2.3	14.1	19.5
	Y4	0.118	0.0129	14	0.414	0.0277	0.702	0.467	23	0.00923	7.37	0.212	0.497	8.8	1.04	16.6	26.7
SG160907	Y1	3.63	0.045	23.4	2.71	1.1	0.26	0.55	12.1	0.073	12	4.38	0.49	2.03	5.91	15.9	19.9
	Y2	4.89	0.15	32.4	5.12	0.39	0.57	3.42	7.89	0.026	4.44	1.38	0.16	10.7	2.99	7.6	10.4
	Y3	4.48	0.097	32	4.79	0.39	0.53	3.72	13.9	0.039	4.01	1.33	0.21	10.2	3.35	7.39	11.2
TL160721	O1	0.427	0.0924	9.2	3.36	0.0855	0.721	6.88	13.6	0.0537	3.12	0.777	0.69	12.7	4.8	7.6	35.8
	O2	0.635	0.0614	12.9	1.99	0.146	0.66	3.63	12.9	0.0453	7.29	0.79	0.873	10.5	4.35	11.3	31.9
	O3	1.43	0.17	18.3	3.65	0.375	0.988	4.56	10	0.125	7.93	1.49	0.985	7.21	5.79	9.69	27.3
	O4	1.16	0.111	16.2	4.27	0.272	0.777	4.33	12.1	0.0774	7.6	1.58	0.694	7.61	5.7	10.1	27.4
SG160907	O1	5.36	0.065	25.5	8.86	0.91	0.29	1.04	7.58	0.046	7.73	4.75	0.32	2.13	4.53	11.6	14.8
	O2	5.78	0.11	24.8	5.93	1.08	0.45	2.2	15.4	0.075	6.57	3.77	0.37	4.42	8.14	7.79	20.6
	O3	6.76	0.097	37.9	7.49	0.32	0.57	4.3	16.3	0.023	3.15	1.23	0.069	10	1.92	4.75	7.45
	Mean Y	2.25757	0.0590714	25.0286	2.362	0.3731	0.463571	1.51643	13.8843	0.0351329	10.56	1.32857	0.441857	6.21714	2.70714	12.9271	19.0857
	Mean O	3.07886	0.100971	20.6857	5.07857	0.4555	0.636571	3.84857	12.5543	0.0636286	6.19857	2.05529	0.571571	7.79571	5.03286	8.97571	23.6071
		PD1high
TL160721	Y1	0.537	0	5.33	2.56	0.207	1.2	4.96	16.1	0.207	3.35	0.703	0.868	13.2	5.33	13.3	32.1
	Y2	0.187	0.25	5.41	1.96	0.0833	1.35	7.41	12.9	0.0625	3.06	0.416	0.812	15	5.29	11.4	34.4
	Y3	0.878	0.14	9.34	2.41	0.211	1.02	4.86	15.1	0.123	4.14	1.26	1.21	9.62	6.55	14.5	28.6
	Y4	0.19	0.0712	4.77	1.07	0.0712	1.42	2.44	17.8	0.0237	1.88	0.38	1.23	18.3	3.37	12.3	34.7
SG160907	Y1	1.61	0.054	13.4	3.61	0.81	0.42	1.4	10.5	0.081	6.05	7.48	0.61	2.34	13.6	19.8	18.2
	Y2	2.9	0.14	19.4	7.93	0.22	1.11	9.61	21.7	0.00764	1.5	1.99	0.21	11.7	5.21	7.97	8.44
	Y3	2.65	0.17	17.2	8.01	0.17	0.66	9.33	22.1	0.037	1.52	2.07	0.1	10.4	4.94	10.7	9.99
TL160721	O1	0.179	0.11	3.31	2.43	0.0998	0.788	9.71	10.8	0.0578	2.91	0.788	1.06	14.7	5.18	11	36.8
	O2	0.168	0.0811	1.93	1.26	0.0757	0.584	7.1	9.52	0.0757	1.72	0.438	0.886	14.3	7.04	10.2	44.6
	O3	0.694	0.215	5.17	3.3	0.295	1.36	10.7	8.78	0.137	3.7	1.05	1.69	11.9	8.16	8.6	34.2
	O4	0.461	0.138	3.94	4.1	0.264	0.873	9.68	8.69	0.0963	2.36	1.3	1.01	13	8.28	7.95	37.8
SG160907	O1	2.02	0.049	11.2	8.63	0.62	0.5	2.54	10.7	0.068	5.49	6.87	0.55	3.14	9.94	16.5	21.3
	O2	1.98	0.16	8.64	6.63	0.35	0.71	5.45	7.97	0.11	2.88	4.01	0.58	5.93	18.3	8.9	27.4
	O3	2.92	0.27	15.4	12	0.15	1.11	14.2	17.2	0.026	1.09	1.6	0.11	13.2	5.37	5.81	9.45
	Mean Y	1.27886	0.117886	10.6929	3.93571	0.253214	1.02571	5.71571	16.6	0.0774057	3.07143	2.04271	0.72	11.5086	6.32714	12.8529	23.7757
	Mean O	1.20314	0.146157	7.08429	5.47857	0.264929	0.846429	8.48286	10.5229	0.0815429	2.87857	2.29371	0.840857	10.8814	8.89571	9.85143	30.2214
