# Supplementary material for: Identification of a super-functional Tfh-like subpopulation in murine lupus by pattern perception
Source: eLife. 2020 May 22;9:e53226. doi: 10.7554/eLife.53226 (PMC7274784; doi:10.7554/eLife.53226)
Supplement: Figure 2—figure supplement 3—source data 1. — Data represent two independent experiments with n = 4 mice per group. Samples were compared using an unpaired two-tailed t-test. [file elife-53226-fig2-figsupp3-data1.xlsx]

## Sheet: figure supplement 3D upperright
DS1_black_Q3	DS5_black_Q3	DS1_green_Q3	DS5_green_Q3	DS1_red_Q3	DS5_red_Q3
12.5	38.3	1.9	9.6	15	25
12.4	27.4	1.6	4.9	13	17.9
11.9	33	1.5	9.1	13	27.6
13.7	31.2	0.6	9.1	4.6	29.2
