# Supplementary material for: Identification of a super-functional Tfh-like subpopulation in murine lupus by pattern perception
Source: eLife. 2020 May 22;9:e53226. doi: 10.7554/eLife.53226 (PMC7274784; doi:10.7554/eLife.53226)
Supplement: Figure 2—source data 1. [file elife-53226-fig2-data1.xlsx]

## Sheet: 2A - anti-ds-DNA-IgG
%PD1	Score 1	Score 2	Score 3	Score 4	Score 5
31.4	0.14
34.9	0.09
35.6		0.23
33.2		0.13
38.1			0.73
46.9			0.3
60.6				1.43
43.5				1.32
70.8					1.59
60.1					1.44
