# Supplementary material for: Identification of a super-functional Tfh-like subpopulation in murine lupus by pattern perception
Source: eLife. 2020 May 22;9:e53226. doi: 10.7554/eLife.53226 (PMC7274784; doi:10.7554/eLife.53226)
Supplement: Figure 2—source data 2. — Data represent two independent experiments with n = 6 or seven mice per group. [file elife-53226-fig2-data2.xlsx]

## Sheet: 2B - CD44 dist
% PD1surf+ of CD44+ CD4+ TC		% IL2+ of CD44+ CD4+ TC		% TNFa+ of CD44+ CD4+ TC		% IFNg+ of CD44+ CD4+ TC		% IL10+ of CD44+ CD4+ TC
Young - NoPU	Old - HighPU	Young - NoPU	Old - HighPU	Young - NoPU	Old - HighPU	Young - NoPU	Old - HighPU	Young - NoPU	Old - HighPU
43.833	87.367	39.3	15.1	72.33	47.43	37.9	43.9	7.82	21.53
43.134	73.134	41.8	27.7	76.93	58.19	42.1	38.2	7.28	14.64
41.452	80.751	44.3	25.1	78.85	55.5	44.4	41.2	7.84	23.2
38.916	76.89	38.3	26.25	72.86	56.3	43.9	43.3	6.32	23.3
35.2	84.5	46.3	28.8	69.6	40.9	47.9	31.5	9.78	21.8
46.4	81.1	46.4	37.1	68.9	44.8	50.3	36.5	9.19	27.8
								10.6	20.3
