# Supplementary material for: Identification of a super-functional Tfh-like subpopulation in murine lupus by pattern perception
Source: eLife. 2020 May 22;9:e53226. doi: 10.7554/eLife.53226 (PMC7274784; doi:10.7554/eLife.53226)
Supplement: Figure 2—source data 3. — Data represent two independent experiments with n = 7 mice per group. [file elife-53226-fig2-data3.xlsx]

## Sheet: 2D - PD1 Subpop
	Score 1							Score 5
IL-2
PD-1 (neg)	40	38.5	40	19.2	41.7	37.3	40.9	38.2	37.9	43.8	36.8	54.3	46.2	68
PD-1 (int)	38.5	41.7	43.8	22.7	41	43	41.7	14.4	22.6	30.3	26.9	40.2	39.2	48.9
PD-1 (hi)	11.7	11.2	17.1	9.66	23	25.5	22.5	8.51	5.52	13.3	9.15	20.4	15.4	21.1
TNFa
PD-1 (neg)	79.1	85.4	84.8	76.3	90.8	92	89.1	66.2	78.2	75.3	74.2	87.7	75.2	90.8
PD-1 (int)	64.7	71.9	73	61.8	70.7	71.6	70.6	38.2	47.9	52.8	53.3	76.8	63.6	75.5
PD-1 (hi)	42.1	35.5	47.9	38.4	63.3	63.6	64.4	31.6	25.3	31.6	29.1	62	41.4	56.2
IFNg
PD-1 (neg)	38.3	40.6	48.7	38	16.3	37	40.5	24	32.2	26.5	31.5	38.6	30.7	70.7
PD-1 (int)	41.9	45.8	48.1	47.5	40.2	72.6	72.1	47.1	43.3	46.3	46.5	55.4	51.6	81.1
PD-1 (hi)	43.9	44.5	43.4	46	33.4	74.5	70.5	42.1	34.9	42.2	40.9	38.7	37.5	76.4
IL-10
PD-1 (neg)	0.848	0.664	0.848	0.192	3.73	3.59	4.24	1.03	0.594	0.958	1.05	12.2	13.6	6.5
PD-1 (int)	6.99	4.73	6.33	2.3	18.4	18.4	18.2	16.5	11.7	17.6	17.5	25.6	27.1	22.1
PD-1 (hi)	14.5	15.7	16.4	7.62	28.7	28	27.4	18.6	16.2	24.6	24.3	30.7	37	36.6
