# Supplementary material for: Identification of a super-functional Tfh-like subpopulation in murine lupus by pattern perception
Source: eLife. 2020 May 22;9:e53226. doi: 10.7554/eLife.53226 (PMC7274784; doi:10.7554/eLife.53226)
Supplement: Figure 2—source data 4. — Data represent two independent experiments with n = 5 mice per group. [file elife-53226-fig2-data4.xlsx]

## Sheet: 2E - TNFa of PD1
	M1	M2	M3	M4	M5	M6
Score 1	69.7	66.4	75.4	58.4	65.9	63.8
Score 5	50.9	53.8	58.4	57.9	47.1	55.2
