# Supplementary material for: Identification of a super-functional Tfh-like subpopulation in murine lupus by pattern perception
Source: eLife. 2020 May 22;9:e53226. doi: 10.7554/eLife.53226 (PMC7274784; doi:10.7554/eLife.53226)
Supplement: Figure 3—figure supplement 1—source data 1. [file elife-53226-fig3-figsupp1-data1.xlsx]

## Sheet: figure supplement 1A pie chart
	Time/FSC Singles/SSC Singles/Cells/alive/CD3+CD4+/CD44/IFNg+IL2+IL10+IL21+TNFa+ | Freq. of Parent	Time/FSC Singles/SSC Singles/Cells/alive/CD3+CD4+/CD44/IFNg+IL2+IL10+IL21+TNFa- | Freq. of Parent	Time/FSC Singles/SSC Singles/Cells/alive/CD3+CD4+/CD44/IFNg+IL2+IL10+IL21-TNFa+ | Freq. of Parent	Time/FSC Singles/SSC Singles/Cells/alive/CD3+CD4+/CD44/IFNg+IL2+IL10+IL21-TNFa- | Freq. of Parent	Time/FSC Singles/SSC Singles/Cells/alive/CD3+CD4+/CD44/IFNg+IL2+IL10-IL21+TNFa+ | Freq. of Parent	Time/FSC Singles/SSC Singles/Cells/alive/CD3+CD4+/CD44/IFNg+IL2+IL10-IL21+TNFa- | Freq. of Parent	Time/FSC Singles/SSC Singles/Cells/alive/CD3+CD4+/CD44/IFNg+IL2+IL10-IL21-TNFa+ | Freq. of Parent	Time/FSC Singles/SSC Singles/Cells/alive/CD3+CD4+/CD44/IFNg+IL2+IL10-IL21-TNFa- | Freq. of Parent	Time/FSC Singles/SSC Singles/Cells/alive/CD3+CD4+/CD44/IFNg+IL2-IL10+IL21+TNFa+ | Freq. of Parent	Time/FSC Singles/SSC Singles/Cells/alive/CD3+CD4+/CD44/IFNg+IL2-IL10+IL21+TNFa- | Freq. of Parent	Time/FSC Singles/SSC Singles/Cells/alive/CD3+CD4+/CD44/IFNg+IL2-IL10+IL21-TNFa+ | Freq. of Parent	Time/FSC Singles/SSC Singles/Cells/alive/CD3+CD4+/CD44/IFNg+IL2-IL10+IL21-TNFa- | Freq. of Parent	Time/FSC Singles/SSC Singles/Cells/alive/CD3+CD4+/CD44/IFNg+IL2-IL10-IL21+TNFa+ | Freq. of Parent	Time/FSC Singles/SSC Singles/Cells/alive/CD3+CD4+/CD44/IFNg+IL2-IL10-IL21+TNFa- | Freq. of Parent	Time/FSC Singles/SSC Singles/Cells/alive/CD3+CD4+/CD44/IFNg+IL2-IL10-IL21-TNFa+ | Freq. of Parent	Time/FSC Singles/SSC Singles/Cells/alive/CD3+CD4+/CD44/IFNg+IL2-IL10-IL21-TNFa- | Freq. of Parent	Time/FSC Singles/SSC Singles/Cells/alive/CD3+CD4+/CD44/IFNg-IL2+IL10+IL21+TNFa+ | Freq. of Parent	Time/FSC Singles/SSC Singles/Cells/alive/CD3+CD4+/CD44/IFNg-IL2+IL10+IL21+TNFa- | Freq. of Parent	Time/FSC Singles/SSC Singles/Cells/alive/CD3+CD4+/CD44/IFNg-IL2+IL10+IL21-TNFa+ | Freq. of Parent	Time/FSC Singles/SSC Singles/Cells/alive/CD3+CD4+/CD44/IFNg-IL2+IL10+IL21-TNFa- | Freq. of Parent	Time/FSC Singles/SSC Singles/Cells/alive/CD3+CD4+/CD44/IFNg-IL2+IL10-IL21+TNFa+ | Freq. of Parent	Time/FSC Singles/SSC Singles/Cells/alive/CD3+CD4+/CD44/IFNg-IL2+IL10-IL21+TNFa- | Freq. of Parent	Time/FSC Singles/SSC Singles/Cells/alive/CD3+CD4+/CD44/IFNg-IL2+IL10-IL21-TNFa+ | Freq. of Parent	Time/FSC Singles/SSC Singles/Cells/alive/CD3+CD4+/CD44/IFNg-IL2+IL10-IL21-TNFa- | Freq. of Parent	Time/FSC Singles/SSC Singles/Cells/alive/CD3+CD4+/CD44/IFNg-IL2-IL10+IL21+TNFa+ | Freq. of Parent	Time/FSC Singles/SSC Singles/Cells/alive/CD3+CD4+/CD44/IFNg-IL2-IL10+IL21+TNFa- | Freq. of Parent	Time/FSC Singles/SSC Singles/Cells/alive/CD3+CD4+/CD44/IFNg-IL2-IL10+IL21-TNFa+ | Freq. of Parent	Time/FSC Singles/SSC Singles/Cells/alive/CD3+CD4+/CD44/IFNg-IL2-IL10+IL21-TNFa- | Freq. of Parent	Time/FSC Singles/SSC Singles/Cells/alive/CD3+CD4+/CD44/IFNg-IL2-IL10-IL21+TNFa+ | Freq. of Parent	Time/FSC Singles/SSC Singles/Cells/alive/CD3+CD4+/CD44/IFNg-IL2-IL10-IL21+TNFa- | Freq. of Parent	Time/FSC Singles/SSC Singles/Cells/alive/CD3+CD4+/CD44/IFNg-IL2-IL10-IL21-TNFa+ | Freq. of Parent	Time/FSC Singles/SSC Singles/Cells/alive/CD3+CD4+/CD44/IFNg-IL2-IL10-IL21-TNFa- | Freq. of Parent
NZBxW_1_4hP+I_001.fcs	1.01 %	0.20 %	1.96 %	0.47 %	3.43 %	0.077 %	20.2 %	2.79 %	0.44 %	0.32 %	1.43 %	2.26 %	0.083 %	0.092 %	3.38 %	4.73 %	0.21 %	0.059 %	0.64 %	0.30 %	2.32 %	0.028 %	16.6 %	3.02 %	0.14 %	0.11 %	1.17 %	2.59 %	0.055 %	0.079 %	9.61 %	20.2 %
NZBxW_2_4hP+I_002.fcs	2.00 %	0.19 %	3.34 %	0.62 %	4.19 %	0.038 %	23.4 %	2.22 %	0.73 %	0.44 %	2.30 %	2.29 %	0.083 %	0.040 %	4.08 %	3.53 %	0.20 %	0.047 %	1.09 %	0.32 %	1.53 %	0.026 %	14.0 %	2.24 %	0.16 %	0.14 %	1.79 %	2.94 %	0.040 %	0.043 %	9.53 %	16.3 %
