# Supplementary material for: Identification of a super-functional Tfh-like subpopulation in murine lupus by pattern perception
Source: eLife. 2020 May 22;9:e53226. doi: 10.7554/eLife.53226 (PMC7274784; doi:10.7554/eLife.53226)
Supplement: Figure 3—figure supplement 1—source data 2. — Data as in Figure 3—source data 1. [file elife-53226-fig3-figsupp1-data2.xlsx]

## Sheet: figure supplement 1B-C PRIstats
% (IL-21+) of CD44+		% (IL21+IFN-g+) of CD44+		% (IL-21+PD-1loIFN-g+) of CD44+		% (PD-1hi CXCR5+) of CD44+		% (PD-1hi CXCR5- IL21+) of CD44+		% (PD1hi) of CD44+		% (PD1hiIL-21+) of CD44+
old	young	old	young	old	young	old	young	old	young	old	young	old	young
5.7	8.3	3.4	4.5	2.3	2.1	1.8	1.4	0.6	0.4	10.8	6	4	3.6
7	5.9	4	4.3	2.5	2.7	2.5	1.4	0.7	0.5	10.9	8.9	4.9	3.2
12.3	11	7.8	6.4	5.6	3.9	1.8	2.1	2.2	1.4	16.7	10.6	10.5	7.8
13.9	9.3	8.2	4.5	5.3	2	1.7	1.3	3.5	0.8	19.1	6.5	11.9	4.7
12.7		7.1		5.2		2.2		2.4		20.3		11.3
10.5		7.8		6.7		3.2		1.6		18.9		8.9
