# Supplementary material for: Identification of a super-functional Tfh-like subpopulation in murine lupus by pattern perception
Source: eLife. 2020 May 22;9:e53226. doi: 10.7554/eLife.53226 (PMC7274784; doi:10.7554/eLife.53226)
Supplement: Figure 3—source data 1. — Data from two pooled experiments involving n = 1–5 mice per group. [file elife-53226-fig3-data1.xlsx]

## Sheet: 3C
Young CD44 +	Old CD44+	Young IL-21+	Old IL-21+	Young IL-21+ IFN-g+	Old IL-21+ IFN-g+	Young IL21+ PD1lo IFNg+	Old IL21+ PD1lo IFNg+	Young TFH	Old TFH	Young IL21+ PD1hi CXCR5-	Old IL21+ PD1hi CXCR5-
15.3	24.1	7.08	5.03	4.34004	3.22423	2.36	2.41	1.74	2.33	0.33	0.64
15.4	27.7	5.24	6.07	3.10208	3.91515	1.93	3.06	1.74	3.17	0.53	0.79
24	56.4	9.18	10.7	5.967	7.3723	4.53	6.19	2.69	2.3	1.26	2.36
20.2	57.5	6.17	11.7	3.42435	7.9677	1.88	5.87	1.44	2.06	0.46	3.54
	75.5		11.4		7.6152		6.67		2.55		2.79
	82.2		7.75		6.0915		4.7		3.54		0.97
