# Supplementary material for: Identification of a super-functional Tfh-like subpopulation in murine lupus by pattern perception
Source: eLife. 2020 May 22;9:e53226. doi: 10.7554/eLife.53226 (PMC7274784; doi:10.7554/eLife.53226)
Supplement: Figure 5—source data 1. — Data represent two independent experiments with n = 4 mice per organ. [file elife-53226-fig5-data1.xlsx]

## Sheet: 5A - cell count
Mouse	PD-1-	PD-1low	PD-1high
M1	207.755	570.861	180.3
M2	301.244	587.418	204.1
M3	109.956	319.967	51.2
M4	128.155	372.004	109
