# Supplementary material for: Identification of a super-functional Tfh-like subpopulation in murine lupus by pattern perception
Source: eLife. 2020 May 22;9:e53226. doi: 10.7554/eLife.53226 (PMC7274784; doi:10.7554/eLife.53226)
Supplement: Figure 5—source data 2. — Data represent two independent experiments with n = 4 mice per organ. [file elife-53226-fig5-data2.xlsx]

## Sheet: 5B - IL21 in Spleen
Spleen	504_M1	504_M2	516_M1	516_M2	Mean
PD-1-	18.5	25.4	19.9	20.1	20.975
PD-1(int)	62.5	54.7	66	63.5	61.675
PD1hi CXCR5+	24.6	24.2	20.2	24.6	23.4
PD1hi CXCR5-	2.52	2.89	4.24	6.45	4.025
