# Supplementary material for: Identification of a super-functional Tfh-like subpopulation in murine lupus by pattern perception
Source: eLife. 2020 May 22;9:e53226. doi: 10.7554/eLife.53226 (PMC7274784; doi:10.7554/eLife.53226)
Supplement: Figure 5—source data 3. — Data represent two independent experiments with n = 4 mice per organ. [file elife-53226-fig5-data3.xlsx]

## Sheet: 5C - IL21 organs
	Kidney				Liver				Lung				Spleen				Sum
PD-1-	2.32	4.56	1.68	2.68	10.4	6.6	7.8	6.98	9.3	12.3	7.15	3.02	8.51	9.13	7.39	8.02	30.53	32.59	24.02	20.7
PD-1(int)	2.54	6.82	3.18	6.25	19.3	14.9	12.7	13.6	11.3	20.4	7.69	5.03	10.8	10.3	7.09	9.06	43.94	52.42	30.66	33.94
PD-1(hi)	4.51	7.41	1.75	14.3	22.3	16.8	15.7	22.1	5.88	30	9.75	6.77	11.1	13.4	6.43	11.4	43.79	67.61	33.63	54.57
