# Supplementary material for: Identification of a super-functional Tfh-like subpopulation in murine lupus by pattern perception
Source: eLife. 2020 May 22;9:e53226. doi: 10.7554/eLife.53226 (PMC7274784; doi:10.7554/eLife.53226)
Supplement: Figure 5—source data 4. — Data represent two independent experiments with n = 4 mice per organ. [file elife-53226-fig5-data4.xlsx]

## Sheet: 5D - PD1 organs
PD1IL21+ IFNghi PD1lo of CD44+					IL21+ CXCR5+ PD1hi of CD44+					IL21+ CXCR5- PD1hi of CD44+
kidney	liver	lung	spleen		kidney	liver	lung	spleen		kidney	liver	lung	spleen
0.6	10.6	5.51	5.12		0.04	0.37	0.42	0.49		0.92	3.54	1.27	2.54
1.21	7.45	8.15	5.25		0	1.39	0	0.62		1.21	1.35	3.43	1.62
1.06	6.26	3.09	3.75		0.11	0.13	0.06	0.44		0.42	1.85	1.28	1.43
1.67	7.12	2.1	4.34		0.42	0.33	0.18	0.85		2.2	2.28	0.88	2.24
