# Supplementary material for: Identification of a super-functional Tfh-like subpopulation in murine lupus by pattern perception
Source: eLife. 2020 May 22;9:e53226. doi: 10.7554/eLife.53226 (PMC7274784; doi:10.7554/eLife.53226)
Supplement: Figure 6—figure supplement 1—source data 1. — Data represent three independent experiments with n = 3–11 mice. [file elife-53226-fig6-figsupp1-data1.xlsx]

## Sheet: figure supplement 1A
	FoxP3	CTLA4(hi)	OX40	TIGIT	IL21	CXCR5	CD40L(hi)	Tbet	CXCR3	ICOS(hi)	Bcl6
PD1- IFNg-	21.9	18.7	17.4	39.9	9.15	1.8	28.8	32.3	32.6	0.7	15.7
PD1- IFNg-	44.9	9.88	28.6		12.5		28.1			2.03
PD1- IFNg-	49		27.9	10		9	26	26.9	19.6		15.4
PD1- IFNg-		19.4			7.89				22.8	3.09
PD1- IFNg-	24.5	12.2	1.84	30		10.9	25.9	25.1			5.25
PD1- IFNg-		19		22.4	7.28	15.8			20.6	4.28
PD1- IFNg-	41.6		29			13.3		73
PD1- IFNg-	27.4		15	7.39	2.49					2.08
PD1- IFNg-				9.77		13.5
PD1- IFNg-	24.5		1.84		3.24					6.57
PD1- IFNg-					3.65
PD1- IFNg-	23.8		13.5		2.35					2.09
PD1- IFNg-			13.4
PD1- IFNg-	26.5		11		1.91
PD1- IFNg-	23.6
PD1- IFNg-	30.9		26.7	5.73
PD1- IFNglow	1.88	2.75	8.33	39.7	17.6	1.58	35.8	76.7	82.6	11.2	19
PD1- IFNglow	3.8	2.07	12.7		21.9		31.1			14.4
PD1- IFNglow	5.58		8.73	1.53		8.36	38.8	66.4	73		18.9
PD1- IFNglow		4.82			16.7				75.2	0.96
PD1- IFNglow	3.51	2.23	1.74	14.4		9.8	45.1	67.4			4.27
PD1- IFNglow		2.89		14.5	11	14.2			66.9	2.25
PD1- IFNglow	2.36		4.12			14.4		95.6
PD1- IFNglow	1.86		3.87	4.36	3.18					2.08
PD1- IFNglow				7.17		14.8
PD1- IFNglow	3.51		1.74		2.79					4.52
PD1- IFNglow					2.78
PD1- IFNglow	2.73		2.76		2.15					5.36
PD1- IFNglow			6.89
PD1- IFNglow	2.55		3.3		1.97
PD1- IFNglow	2.43
PD1- IFNglow	3.88		6.69	3.76
PD1- IFNghi	1.03	1.29	4.22	39.1	22.5	1.35	58.6	90.5	93.9	8.08	20.9
PD1- IFNghi	1.1	1.23	8.09		31.1		48.1			8.28
PD1- IFNghi	0		4.25	0.47		11.5	65.8	73.5	87.2		23.9
PD1- IFNghi		3.89			26.8				89.8	0.33
PD1- IFNghi	1.67	2.08	0.95	15.7		8.63	67.5	82.4			8.27
PD1- IFNghi		2.97		18.4	26.3	16.1			83.3	1.49
PD1- IFNghi	1.91		15.2			10.8		99.5
PD1- IFNghi	1.27		7.39	4.4	12					0.54
PD1- IFNghi				5.63		10.5
PD1- IFNghi	1.67		0.95		4.5					2.55
PD1- IFNghi					5.1
PD1- IFNghi	0.27		3.6		4.15					6.55
PD1- IFNghi			5.84
PD1- IFNghi	0.34		3.74		5.34
PD1- IFNghi	0.61
PD1- IFNghi	1.97		5.36	1.81
PD1low IFNg-	25.3	22.2	59.9	65.1	8.91	9.36	14.5	67.5	64.9	11	18.3
PD1low IFNg-	34.2	13.3	63		10.4		15.2			6.61
PD1low IFNg-	45.4		59.3	39.7		31.8	14.7	33.6	40.9		15.7
PD1low IFNg-		24.8			4.23				41.8	11.6
PD1low IFNg-	24.3	15.3	25	66.9		29.6	11.7	58.7			9.97
PD1low IFNg-		22.9		66.9	3.61	33.7			48.3	10.2
PD1low IFNg-	33.1		74.5			39.7		87.3
PD1low IFNg-	25.5		59.8	51.1	2.32					9.45
PD1low IFNg-				55.4		27.7
PD1low IFNg-	24.3		25		1.48					13.5
PD1low IFNg-					1.38
PD1low IFNg-	45		59.1		1.28					8.46
PD1low IFNg-			63.5
PD1low IFNg-	34.8		59		1.47
PD1low IFNg-	27.9
PD1low IFNg-	41.1		69.6	40.1
PD1low IFNglow	3.1	4.59	56	57.8	21.7	10.1	16.8	80.4	88.5	26.4	33
PD1low IFNglow	4.08	1.86	51.3		25.2		18.3			18.9
PD1low IFNglow	4.58		42	15.7		38.2	18.8	53.2	79.2		24.8
PD1low IFNglow		7.66			11.8				80.2	9.29
PD1low IFNglow	3.59	3.66	17	51.5		36.6	11.8	82.1			17.3
PD1low IFNglow		7.47		47.7	11.6	37			80.4	7.7
PD1low IFNglow	4.08		67.1			50.8		98.1
PD1low IFNglow	3.27		49.4	30.8	13.1					7.25
PD1low IFNglow				37.1		31.9
PD1low IFNglow	3.59		17		3.21					9.7
PD1low IFNglow					2.86
PD1low IFNglow	6.64		49.1		2.55					7.91
PD1low IFNglow			61.8
PD1low IFNglow	3.68		53.5		3.18
PD1low IFNglow	2.8
PD1low IFNglow	5.7		61.4	24.6
PD1low IFNghigh	2.33	4.43	53.1	56.3	30.2	8.8	58.7	87.5	94.3	11	37.7
PD1low IFNghigh	2.78	1.66	52.4		38.7		50.2			6.61
PD1low IFNghigh	3.06		38.5	10.6		33.4	64.3	72.2	90.2		34.2
PD1low IFNghigh		7.11			26.8				89.5	10.5
PD1low IFNghigh	2.76	3.65	15.5	50.2		32.6	50.1	88.2			21.2
PD1low IFNghigh		6.6		41.8	35.4	40.8			86.2	7.59
PD1low IFNghigh	5.18		56.8			43.5		98.9
PD1low IFNghigh	5.32		34.3	22.2	35					6.15
PD1low IFNghigh				27.8		23.8
PD1low IFNghigh	2.76		15.5		7.56					12.6
PD1low IFNghigh				19.3	5.83
PD1low IFNghigh	3.71		43.8		6.29					11.3
PD1low IFNghigh			53.2
PD1low IFNghigh	1.72		43.7		8.32
PD1low IFNghigh	0.59
PD1low IFNghigh	4.95		55.2
PD1high IFNg-	22.7	20.6	69.2	85.5	10.6	46.3	16.2	63	70.4	26.4	39.9
PD1high IFNg-	18.6	8.68	75.3		7.64		15.6			18.9
PD1high IFNg-	22.9		54.5	56		68.9	20.9	29.3	48.2		33.4
PD1high IFNg-		25.3			2.53				55.1	24.5
PD1high IFNg-	14.8	16.3	37.1	90.1		73.5	10.7	70.4			29.8
PD1high IFNg-		25.6		88.9	4.42	73.6			49.9	9.84
PD1high IFNg-	20.5		83.9			86.1		89.8
PD1high IFNg-	18		75	80.2	4.04					16.6
PD1high IFNg-				86.8		67.5
PD1high IFNg-	14.8		37.1		1.41					23.4
PD1high IFNg-				75.5	1.33
PD1high IFNg-	23.4		65.3		1.72					16.6
PD1high IFNg-			73.5
PD1high IFNg-	25		67.6		2.8
PD1high IFNg-	19
PD1high IFNg-	34.2		84.7
PD1high IFNglow	8.87	14.3	83.3	84.5	27.4	42.9	23.6	82.7	88.3	27.3	53.7
PD1high IFNglow	7.08	6.1	82.3		26.5		20.9			21.9
PD1high IFNglow	5.1		69	54.3		74.4	23.2	49.6	83		43.5
PD1high IFNglow		13.3			8.79				86.3	24.6
PD1high IFNglow	6.04	8.48	41.9	90.8		77.7	12.8	85.6			40.6
PD1high IFNglow		13.5		89.8	16.7	71.9			79.6	12.9
PD1high IFNglow	11.8		90.6			81.4		98.9
PD1high IFNglow	7.03		87.1	74.2	14.8					20.7
PD1high IFNglow				80.7		64.6
PD1high IFNglow	6.04		41.9		4.55					15.8
PD1high IFNglow				69.3	3.41
PD1high IFNglow	6.69		75.5		3.05					17.4
PD1high IFNglow			84.3
PD1high IFNglow	3.81		75.1		7.47
PD1high IFNglow	3.21
PD1high IFNglow	8.93		87.6
PD1high IFNghigh	8.33	13.4	85.2	80.6	32.7	40.2	67.1	90.1	92.5	30.8	62
PD1high IFNghigh	7.85	0	89.1		26.3		65.8			33.3
PD1high IFNghigh	5.42		75.9	49.3		71	68.7	68.1	94.1		50.3
PD1high IFNghigh		16.3			15.1				94.4	22.6
PD1high IFNghigh	9.43	8.9	48.3	92.3		70.9	50.5	91.4			53.7
PD1high IFNghigh		14.5		100	25.4	74.9			88	17.5
PD1high IFNghigh	8.79		93.9			86.6		99.4
PD1high IFNghigh	11.1		76.9	68	53.6					24.3
PD1high IFNghigh				77.8		56.7
PD1high IFNghigh	9.43		48.3		7.02					17.4
PD1high IFNghigh				65.5	5.98
PD1high IFNghigh	10.8		89.9		6.69					18.6
PD1high IFNghigh			94.8
PD1high IFNghigh	2.86		98.5		14.5
PD1high IFNghigh	1.83
PD1high IFNghigh	5.5		89.6
