# Supplementary material for: Identification of a super-functional Tfh-like subpopulation in murine lupus by pattern perception
Source: eLife. 2020 May 22;9:e53226. doi: 10.7554/eLife.53226 (PMC7274784; doi:10.7554/eLife.53226)
Supplement: Figure 6—source data 1. — Data represent three independent experiments with n = 3–9 mice. [file elife-53226-fig6-data1.xlsx]

## Sheet: 6B categories
	IFNg-									IFNg(lo)									IFNg(hi)
CXCR5
PD1-	1.8		9		10.9	15.8	13.3		13.5	1.58		8.36		9.8	14.2	14.4		14.8	1.35		11.5		8.63	16.1	10.8		10.5
PD1(lo)	9.36		31.8		29.6	33.7	39.7		27.7	10.1		38.2		36.6	37	50.8		31.9	8.8		33.4		32.6	40.8	43.5		23.8
PD1(hi)	46.3		68.9		73.5	73.6	86.1		67.5	42.9		74.4		77.7	71.9	81.4		64.6	40.2		71		70.9	74.9	86.6		56.7
Bcl6
PD1-	15.7		15.4		5.25					19		18.9		4.27					20.9		23.9		8.27
PD1(lo)	18.3		15.7		9.97					33		24.8		17.3					37.7		34.2		21.2
PD1(hi)	39.9		33.4		29.8					53.7		43.5		40.6					62		50.3		53.7
IL21 in pop
PD1-	9.15	12.5	7.89	7.28	2.49	3.24	3.65	2.35	1.91	17.6	21.9	16.7	11	3.18	2.79	2.78	2.15	1.97	22.5	31.1	26.8	26.3	12	4.5	5.1	4.15	5.34
PD1(lo)	8.91	10.4	4.23	3.61	2.32	1.48	1.38	1.28	1.47	21.7	25.2	11.8	11.6	13.1	3.21	2.86	2.55	3.18	30.2	38.7	26.8	35.4	35	7.56	5.83	6.29	8.32
PD1(hi)	10.6	7.64	2.53	4.42	4.04	1.41	1.33	1.72	2.8	27.4	26.5	8.79	16.7	14.8	4.55	3.41	3.05	7.47	32.7	26.3	15.1	25.4	53.6	7.02	5.98	6.69	14.5
