# Supplementary material for: Identification of a super-functional Tfh-like subpopulation in murine lupus by pattern perception
Source: eLife. 2020 May 22;9:e53226. doi: 10.7554/eLife.53226 (PMC7274784; doi:10.7554/eLife.53226)
Supplement: Figure 6—source data 2. — Data represent three independent experiments with n = 3–9 mice. [file elife-53226-fig6-data2.xlsx]

## Sheet: 6C IL21+ of CD44+
IL21+ of CD44+	IFNg-									IFNg(lo)									IFNg(hi)
PD1-	0.25	0.86	1	0.66	0.74	0.82	0.62			0.059	0.92	0.59	0.44	0.19	0.23	0.19			0.083	0.78	0.75	0.65	0.24	0.15	0.23
PD1(lo)	0.48	1.26	1.48	0.56	0.37	0.35	0.33			0.73	3.12	2.54	2.06	0.5	0.49	0.33			0.52	1.62	1.51	0.88	0.61	0.38	0.35
PD1(hi)	0.3	0.29	0.33	0.31	0.1	0.11	0.14			0.59	0.52	0.51	0.53	0.24	0.2	0.15			0.1	0.09	0.23	0.24	0.15	0.16
