# Supplementary material for: Identification of a super-functional Tfh-like subpopulation in murine lupus by pattern perception
Source: eLife. 2020 May 22;9:e53226. doi: 10.7554/eLife.53226 (PMC7274784; doi:10.7554/eLife.53226)
Supplement: Figure 7—source data 1. — Data represent one of three independent experiments with n = 3–4 mice. [file elife-53226-fig7-data1.xlsx]

## Sheet: 7B IgG
us	stim	IL21	CD40L	CD40L+IL21	IFNg	pos
29.2151	259.709	71.686	102.849	22.3546	332.587	291.105
19.8837	234.622	138.605	128.023	33.6919	414.855	258.256
34.5639	215.988	113.081	104.738	34.0116	240.145	201.744
	178.605
