# Supplementary material for: Identification of a super-functional Tfh-like subpopulation in murine lupus by pattern perception
Source: eLife. 2020 May 22;9:e53226. doi: 10.7554/eLife.53226 (PMC7274784; doi:10.7554/eLife.53226)
Supplement: Figure 7—source data 2. — Data on B cell count and viability are representative of one out of two experiments involving six replicates per condition. Data on GL7+ Fas+ GC-like B cells and CD138+ antibody-producing cells are pooled data from two independent experiments involving 1–7 replicates. [file elife-53226-fig7-data2.xlsx]

## Sheet: 7C Bcells
total CD4-B220+ perwell						live CD4-B220+
Neg Ctrl	Pos Ctrl IL-21 + aCD40	PD-1hi	PD1lo CXCR3+	PD1lo CXCR3-		Neg Ctrl	Pos Ctrl IL-21 + aCD40	PD-1hi	PD1lo CXCR3+	PD1lo CXCR3-
5701	8380	6246	28178	26582		96	1147	3358	482	84
5660	13899	8634	29963	23166		102	1316	6895	499	316
4898	8297	10347	34692	20601		67	1617	3656	349	122
4495	17518	6392	22014	15488		55	1241	8066	399	57
3686	8395	6886	26650	14767		38	1143	3877	360	51
3350	10268	7739	28155	15123		45	1126	4818	201	87
% live GC-like						% live CD138+ cells
Neg Ctrl	Pos Ctrl IL-21 + aCD40	PD-1hi	PD1lo CXCR3+	PD1lo CXCR3-		Neg Ctrl	Pos Ctrl IL-21 + aCD40	PD-1hi	PD1lo CXCR3+	PD1lo CXCR3-
0.41	43.5	0.78	35.7	35.4		17.28	1.29024	22.3514	1.7556	1.81812
0.8	41.2	1.9	57.3	35.3		14.4828	1.31318	22.6023	1.96105	7.9
1.15	42.5	0.12	19.7	31.3		12.4375	2.01027	21.2986	2.29548	6.643
0.75	50.4	0.32	52.6	45.5		22.23	2.0237	19.7583	2.37864	2.0808
0.28	39.9	0.61	49	23.7		15.0304	1.64	24.9744	1.89912	6.8625
0.5	34.6	1.24	37.9	28.9		18.6432	1.3664	18.772	4.09975	4.48116
1.05	66.3	5.45	14.7	23.1		13.6	3.51	10.1	6.54	10.2
0	51.9		19.6	19.7		20.6	2.9		10.5	6.37
1.6	40		16.9			17	3.95		7.29
