# Supplementary figures and images for: Identification of a super-functional Tfh-like subpopulation in murine lupus by pattern perception
Source: eLife journal article supplement (doi:10.7554/elife.53226), 2020-05-22

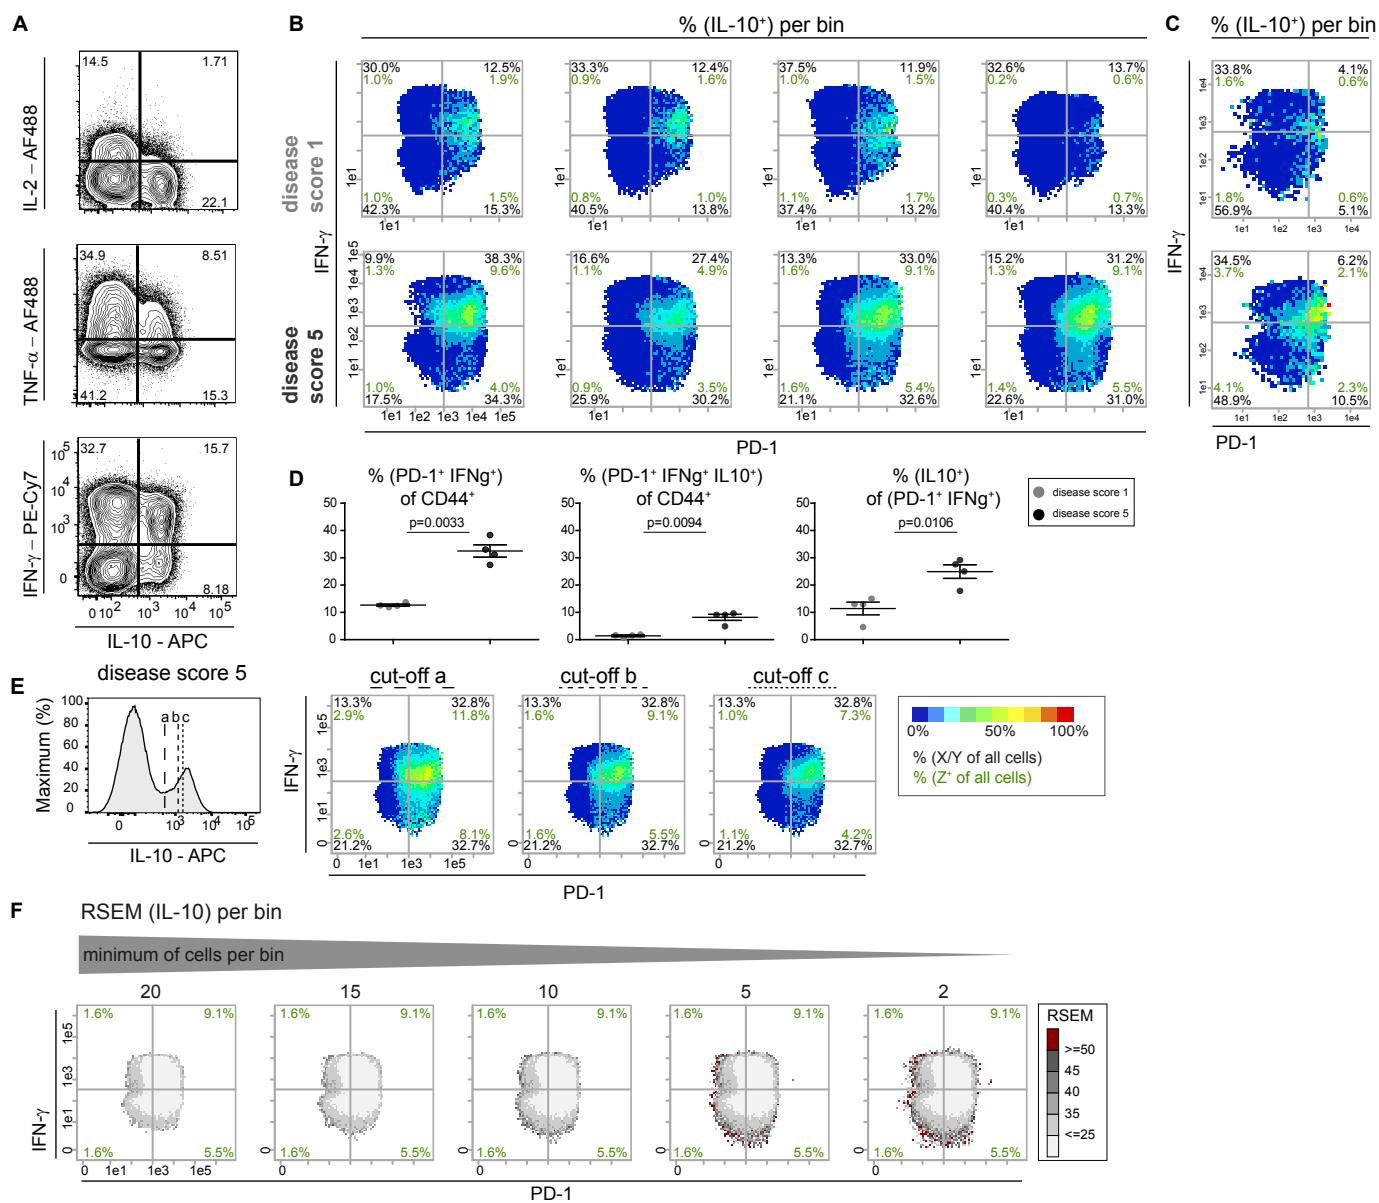

Supplement: supp [file elife-53226-supp-v1.zip]

**A** % (positive cells of categories) [Fig. 7a]

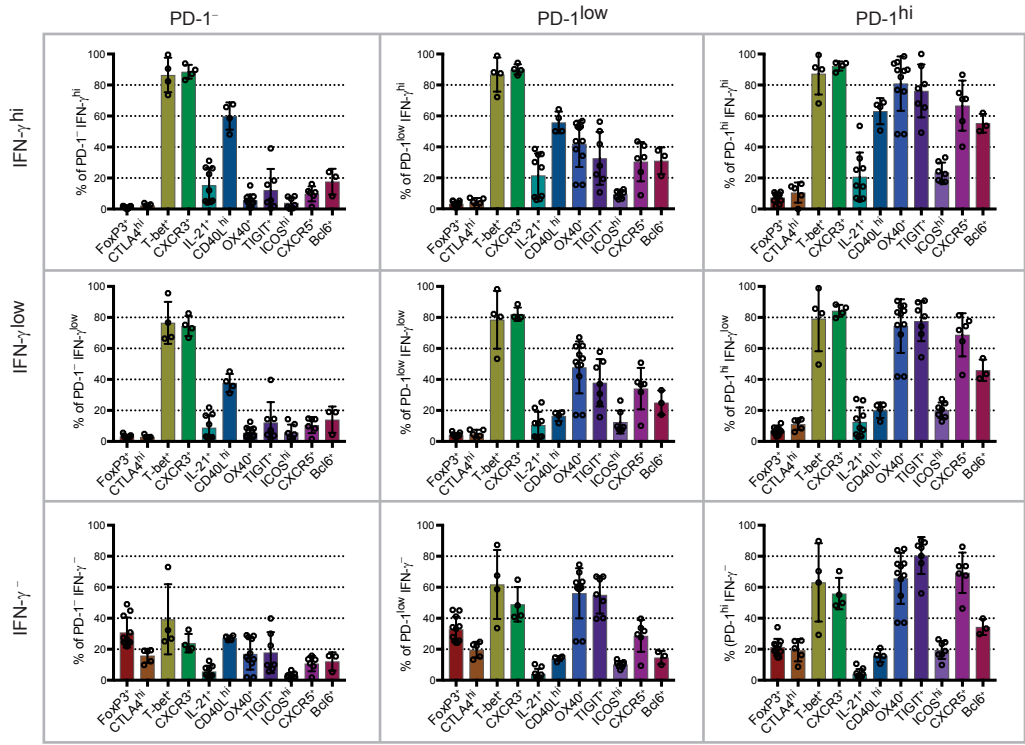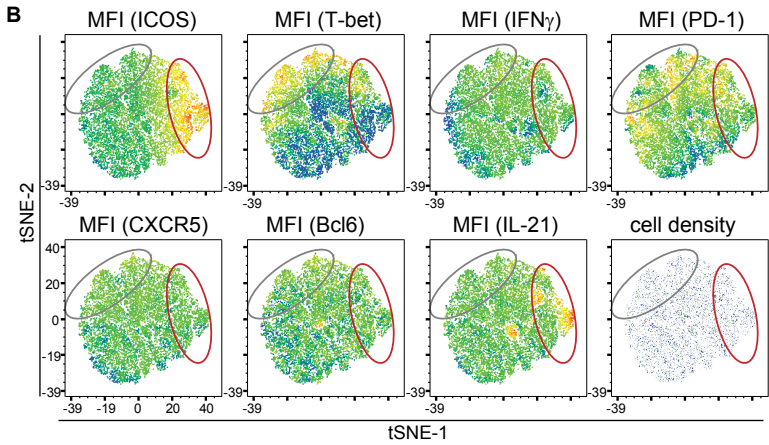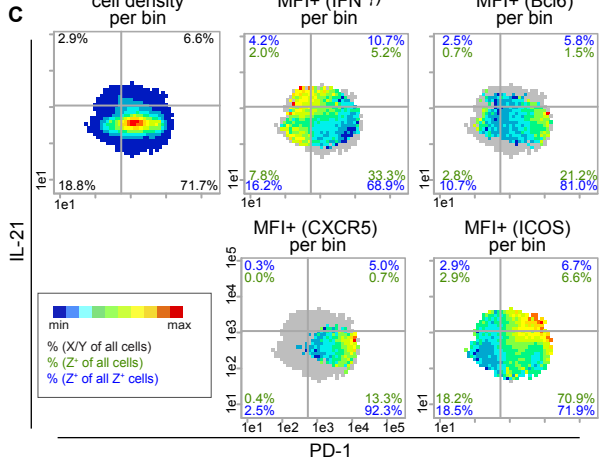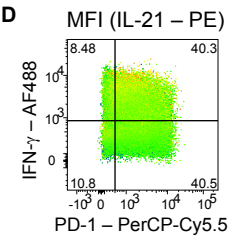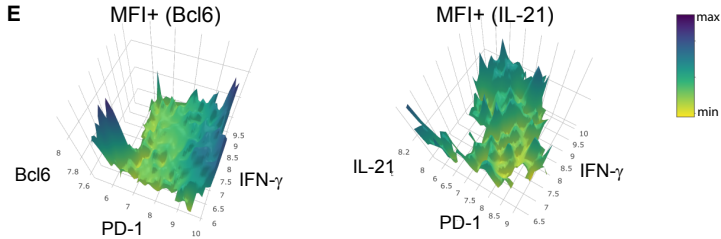

Supplement: supp [file elife-53226-supp-v1.zip]

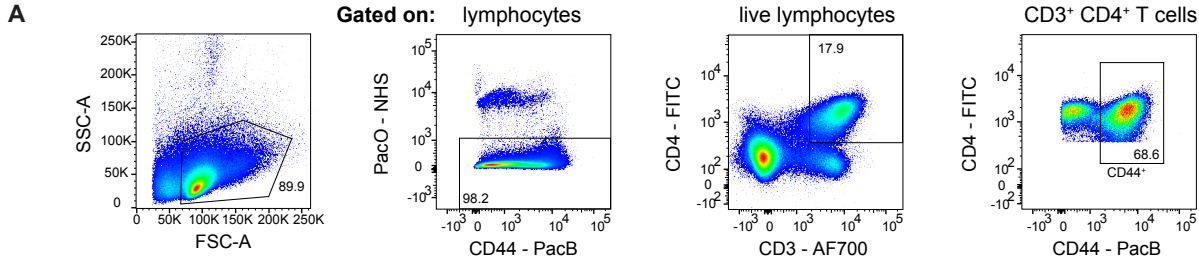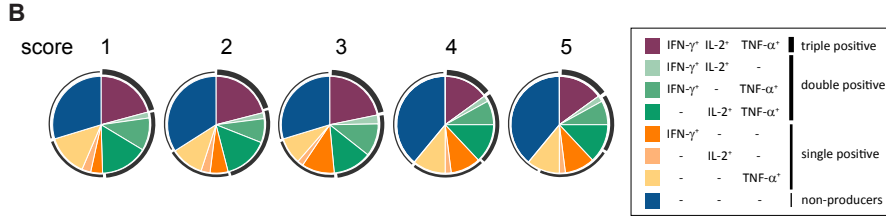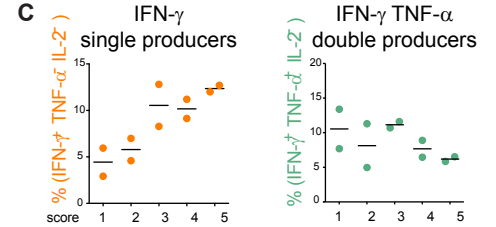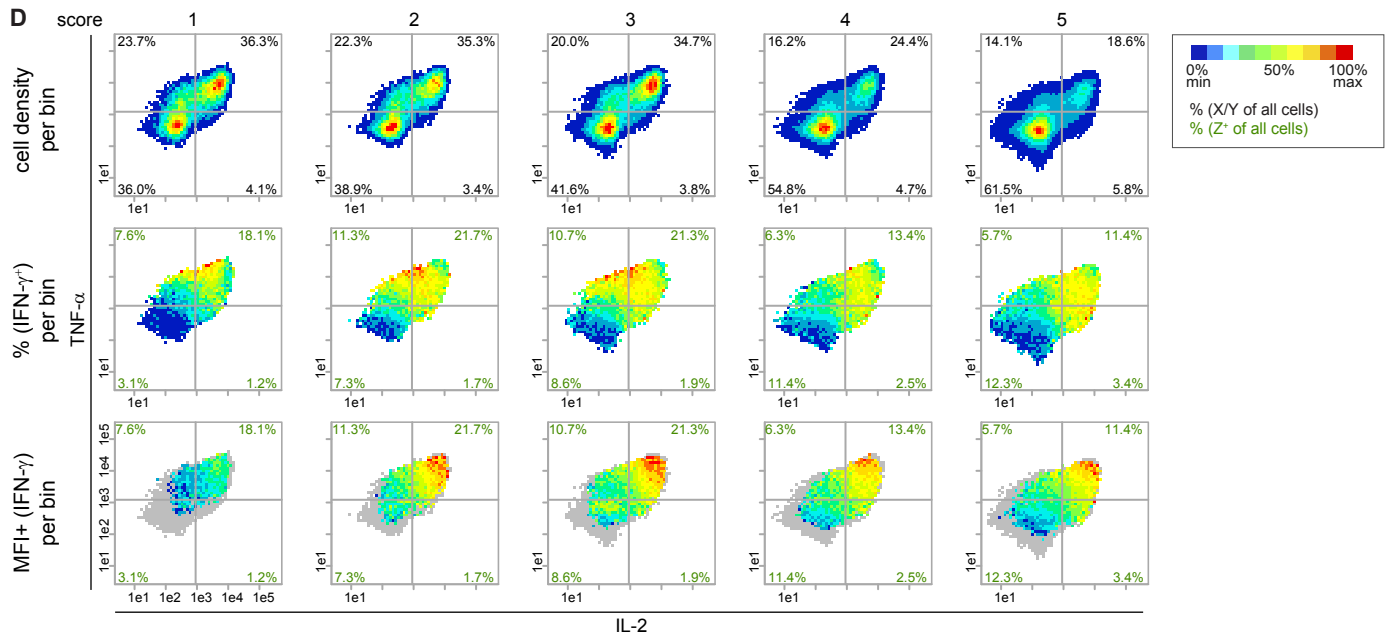

Supplement: supp [file elife-53226-supp-v1.zip]

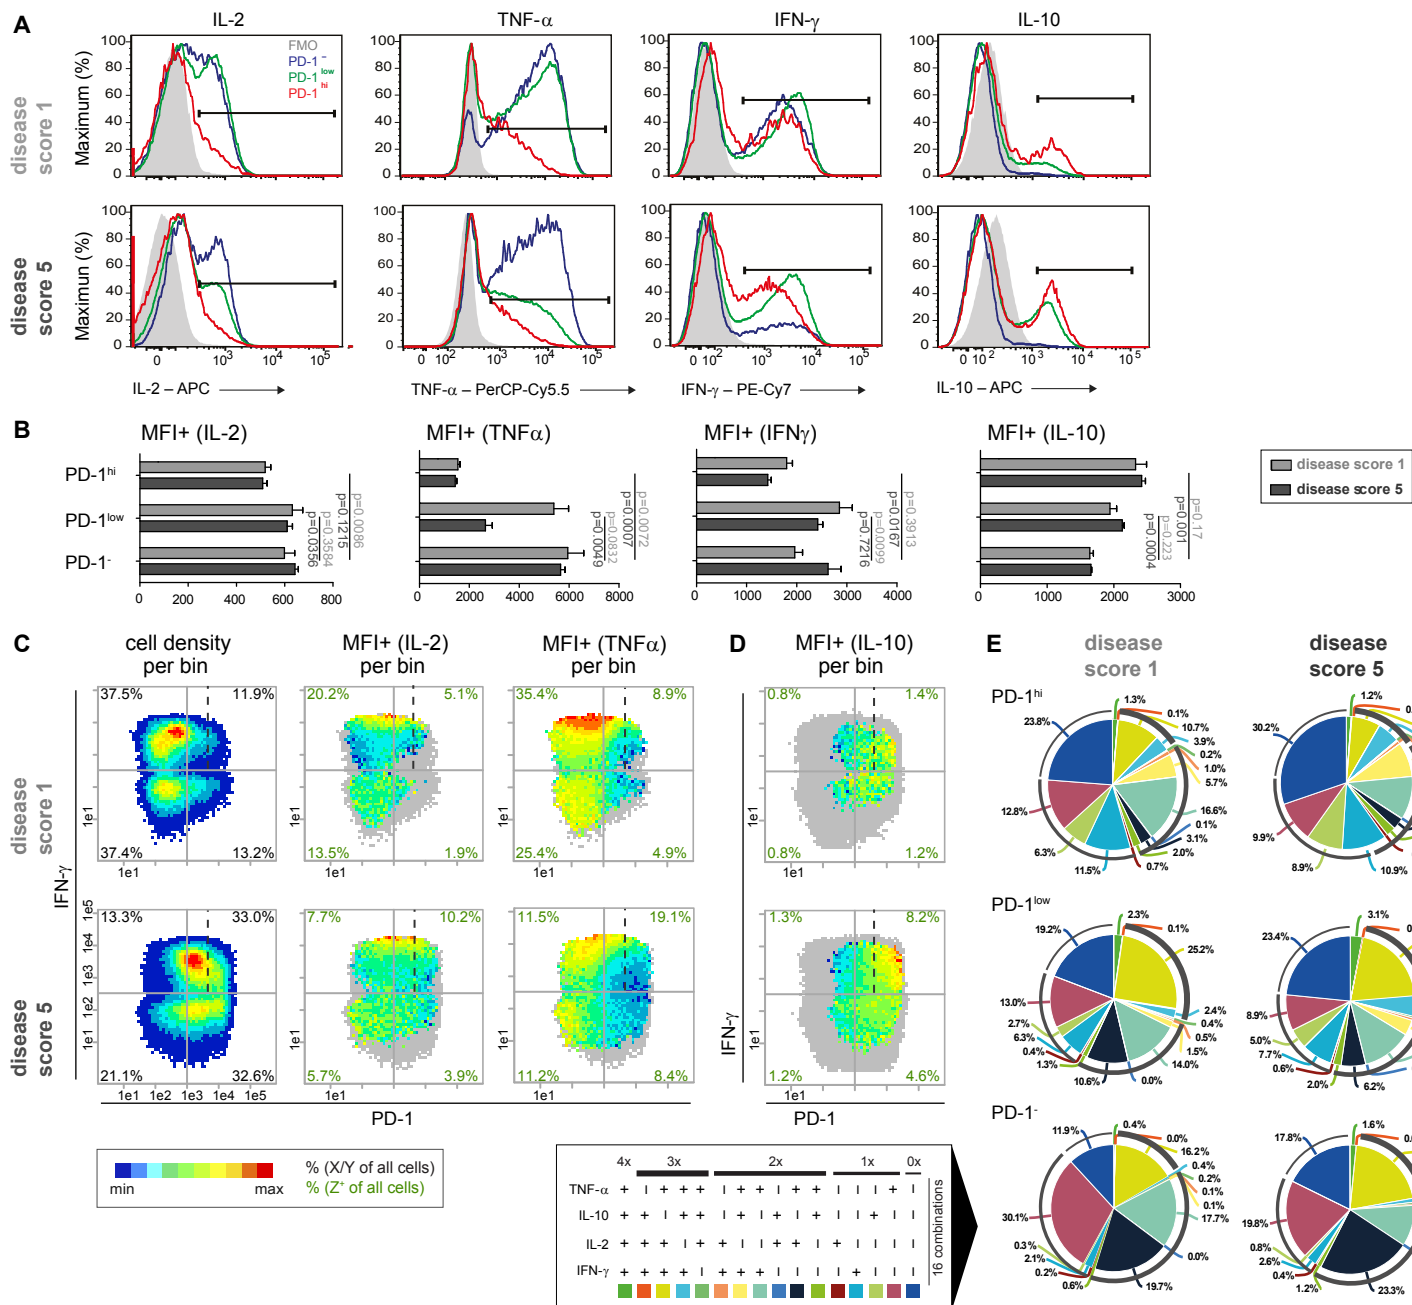

Supplement: supp [file elife-53226-supp-v1.zip]

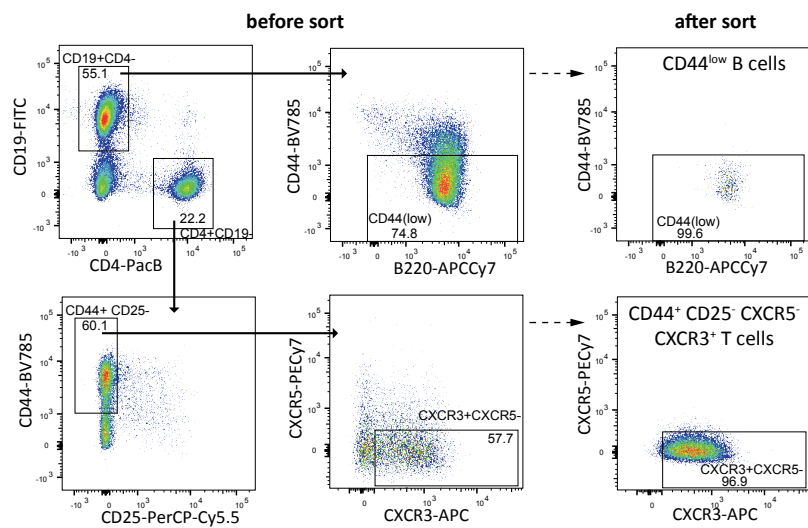

Supplement: supp [file elife-53226-supp-v1.zip]

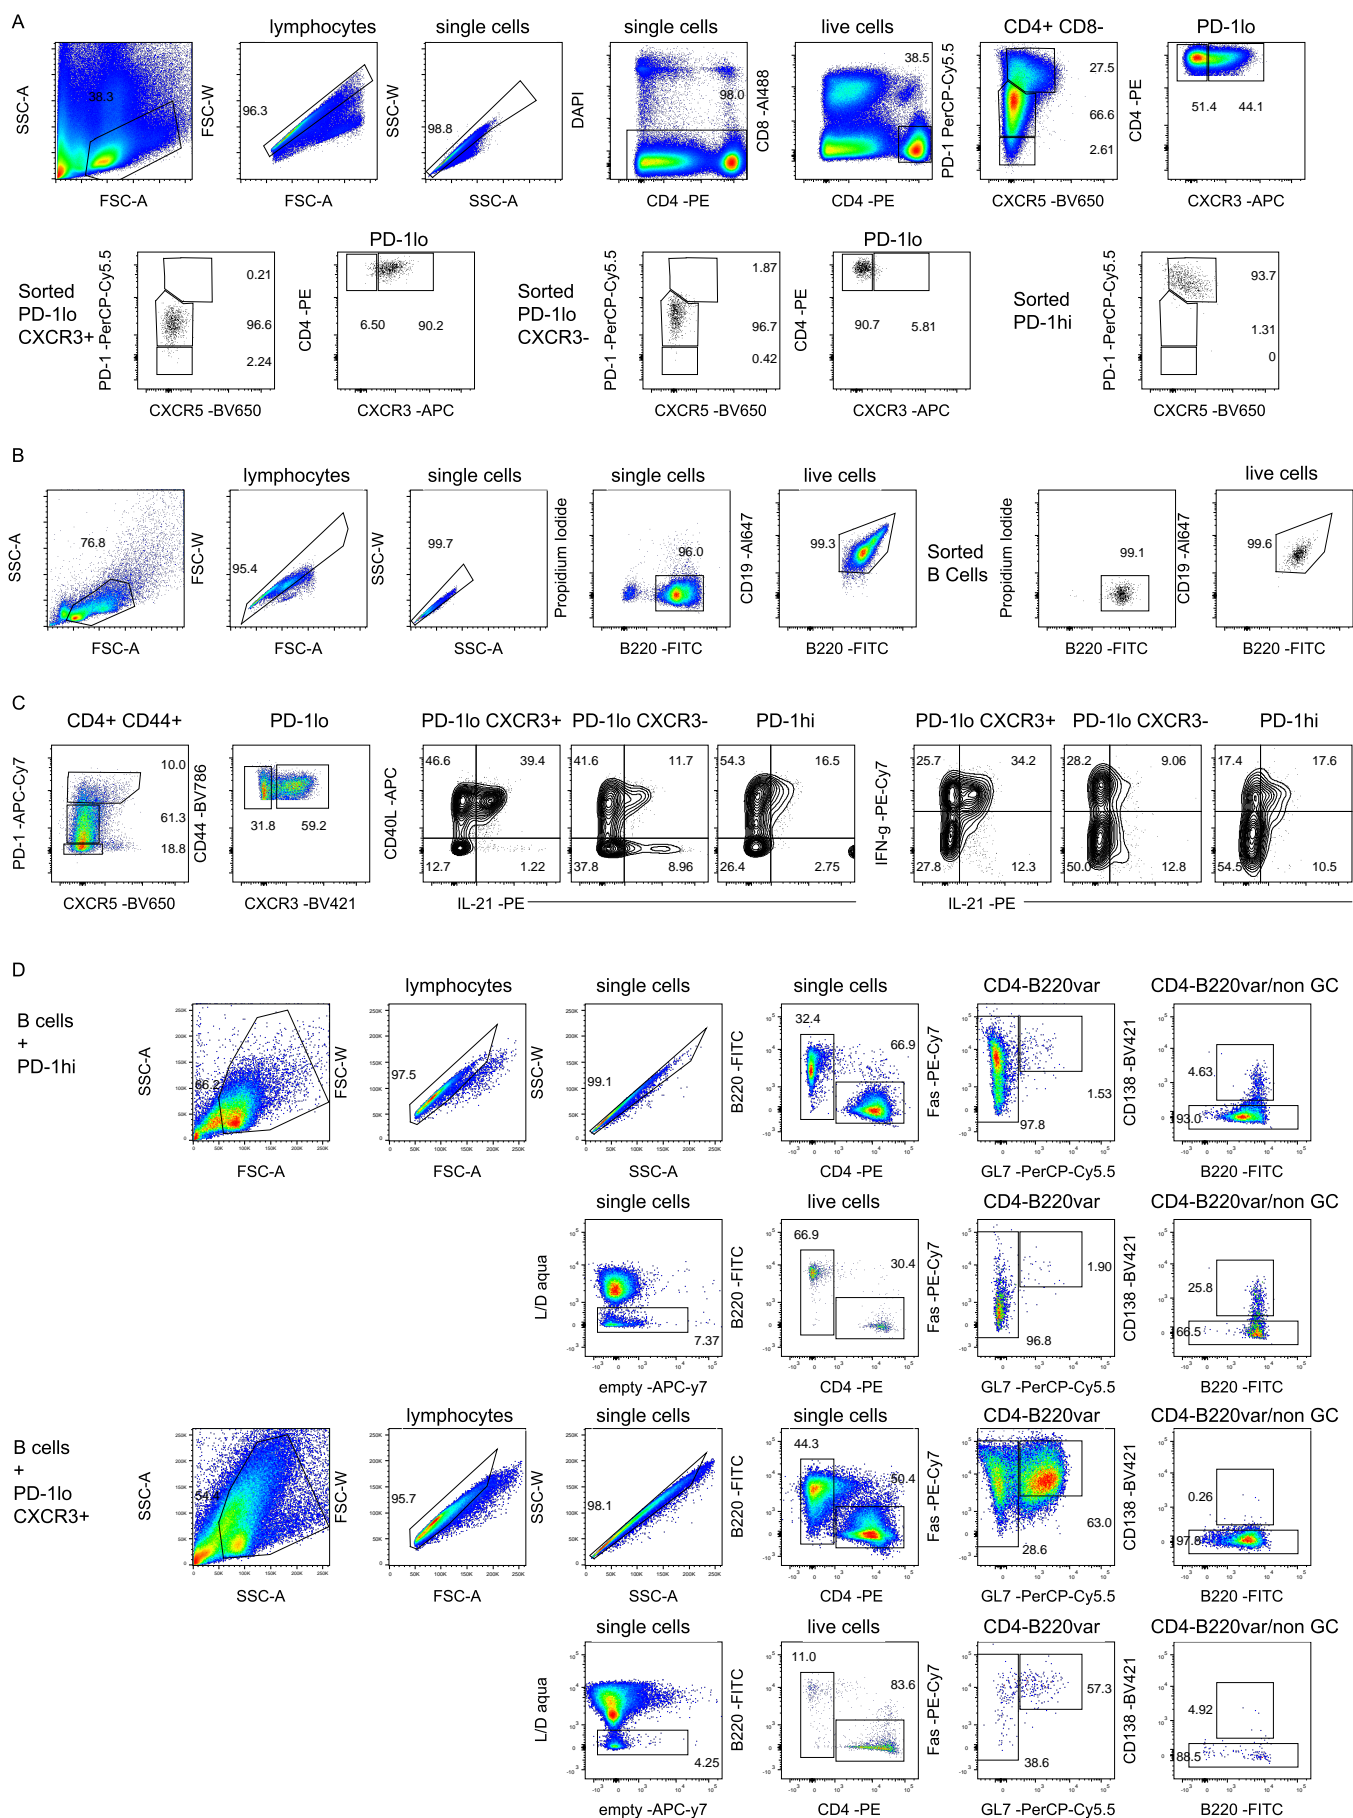

Supplement: supp [file elife-53226-supp-v1.zip]

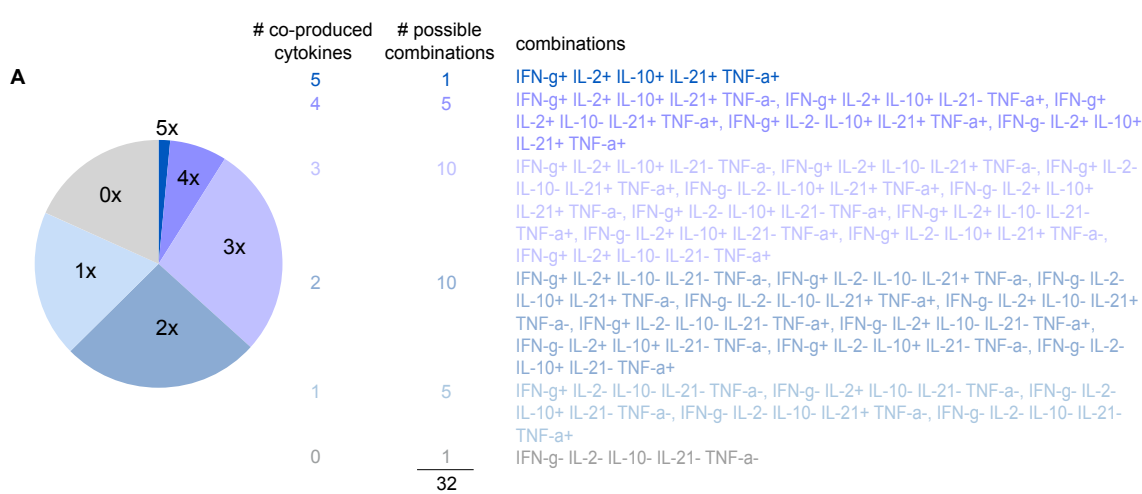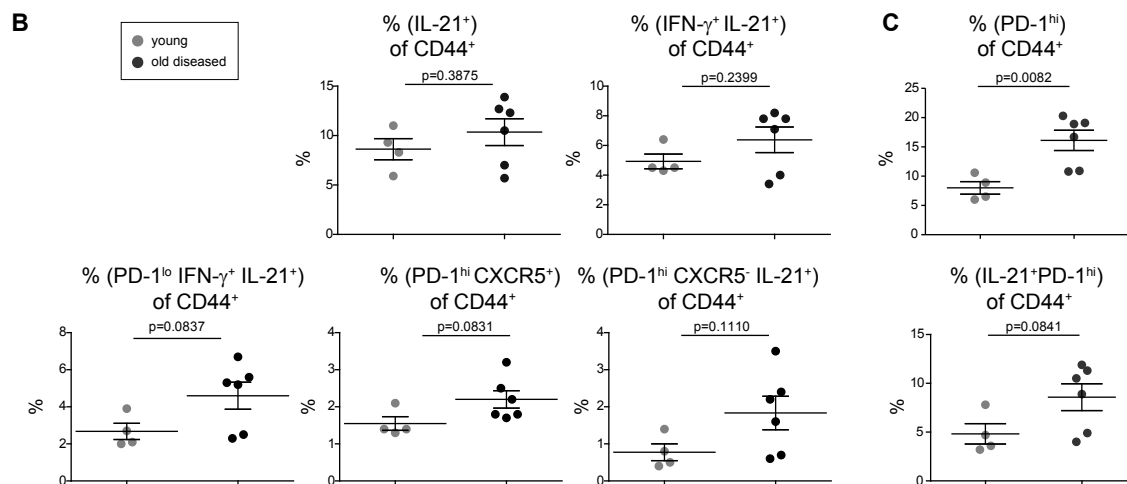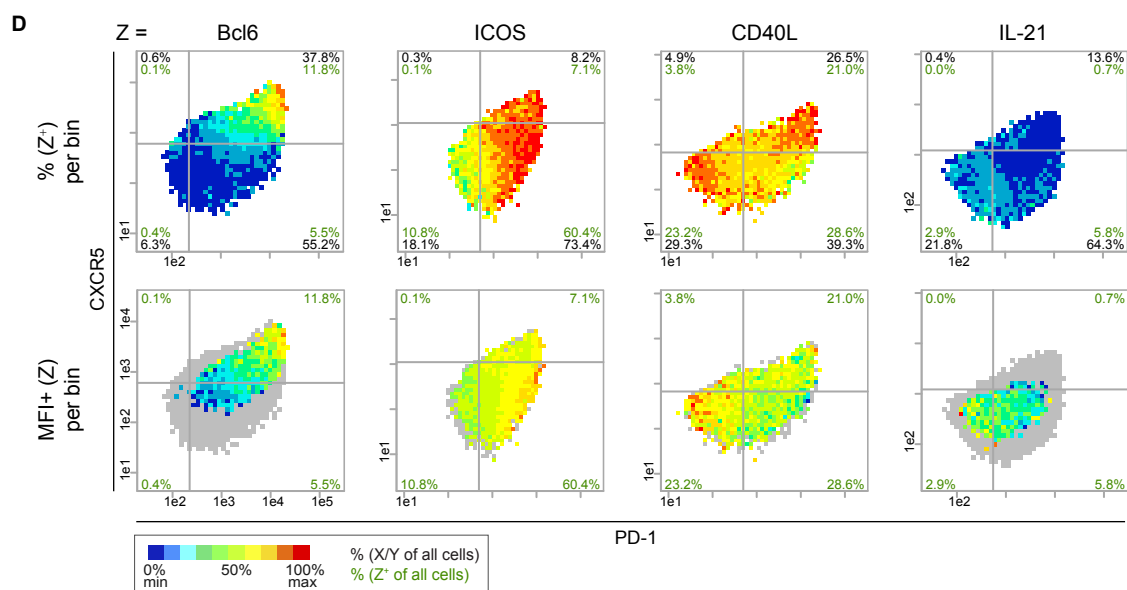

Supplement: supp [file elife-53226-supp-v1.zip]

A

MFI+ (Z) per bin

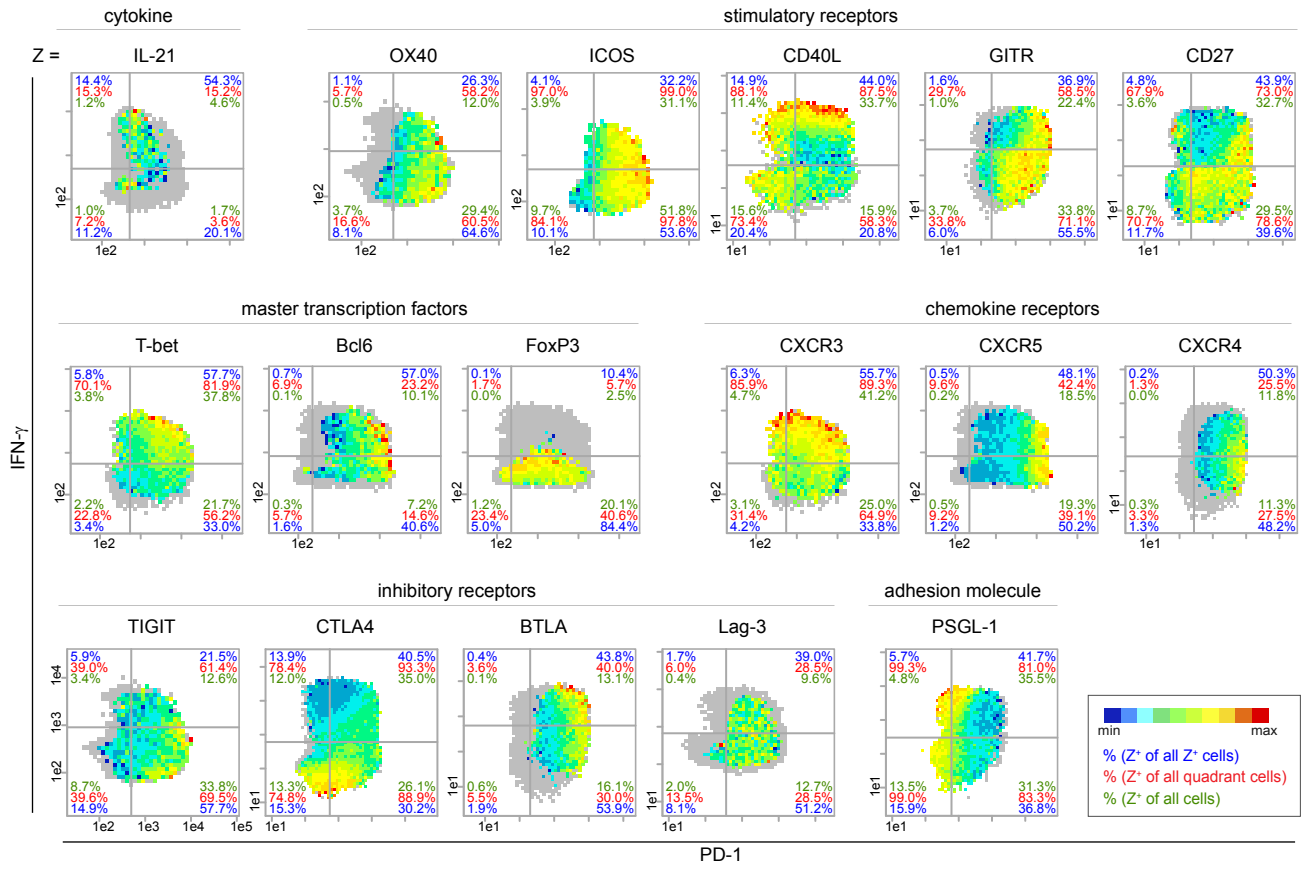

B

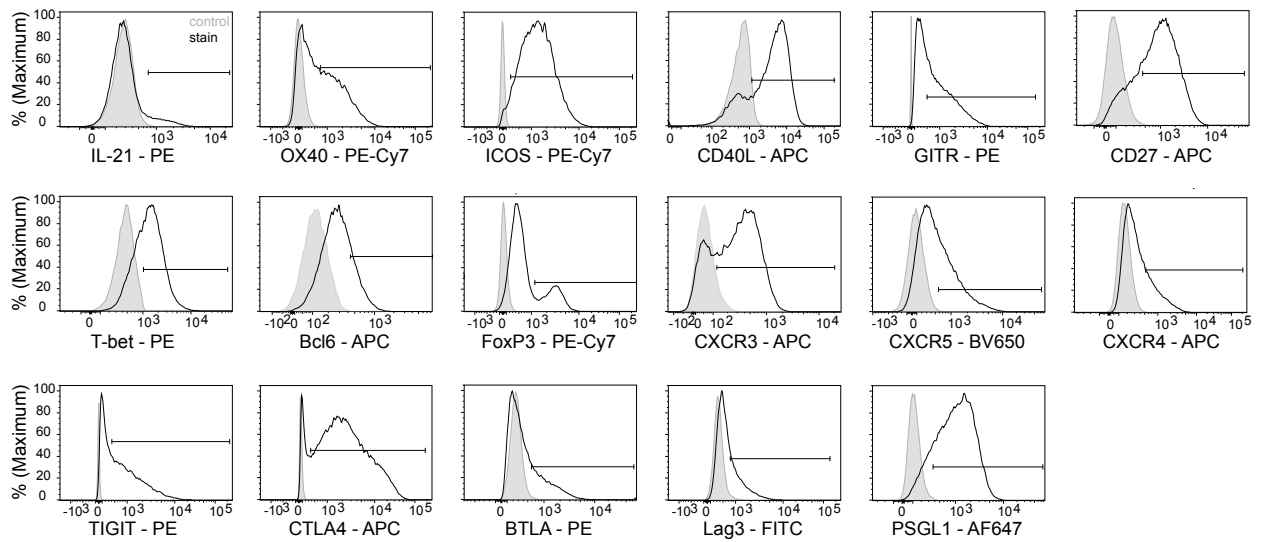

Supplement: supp [file elife-53226-supp-v1.zip]
